# Supplementary material for: Improved catalytic performance of encapsulated Ru nanowires for aqueous-phase Fischer–Tropsch synthesis
Source: Royal Society of Chemistry journal article supplement (doi:10.1039/c5cy01027f), 2015-11-09
Supplement: c5cy01027f1.pdf [file c5cy01027f1.pdf]

Supporting information

## Improved catalytic performance of encapsulated Ru nanowires for aqueous-phase Fischer-Tropsch synthesis

*Guojun Lan*<sup>a, b+</sup>, *Yi Yao*<sup>a+</sup>, *Xiaoming Zhang*<sup>a</sup>, *Miao Guo*<sup>a</sup>, *Haodong Tang*<sup>b</sup>, *Ying Li*<sup>b\*</sup>, *Qihua Yang*<sup>a\*</sup>

<sup>a</sup> State Key Laboratory of Catalysis, Dalian Institute of Chemical Physics, Chinese Academy of Sciences, 457 Zhongshan Road, Dalian 116023 (China)

<sup>b</sup> Institute of Industrial Catalysis, Zhejiang University of Technology, Hangzhou 310014 (China)

<sup>+</sup> The authors contribute equally to this work

\* To whom correspondence should be addressed Email Address: [liying@zjut.edu.cn](mailto:liying@zjut.edu.cn); [yangqh@dicp.ac.cn](mailto:yangqh@dicp.ac.cn); URL: <http://www.hmm.dicp.ac.cn>

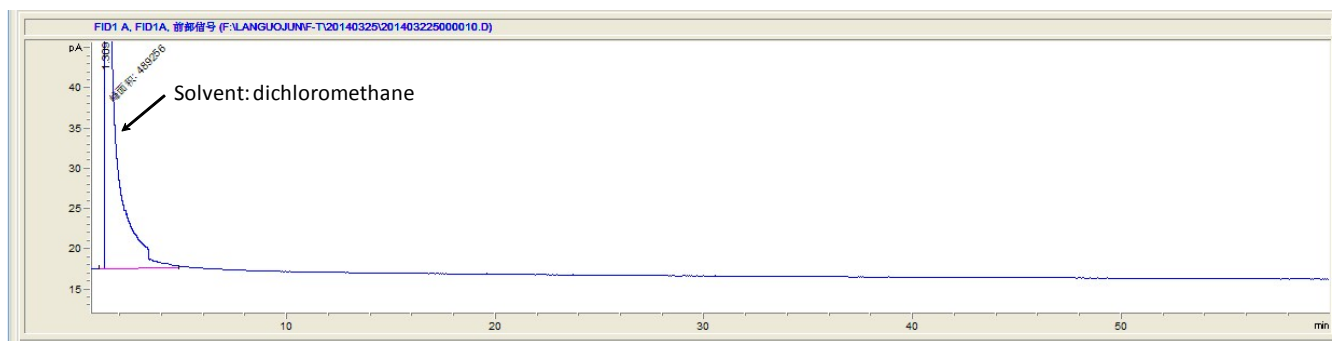

Figure S1. The typical GC spectrum of aqueous phase.

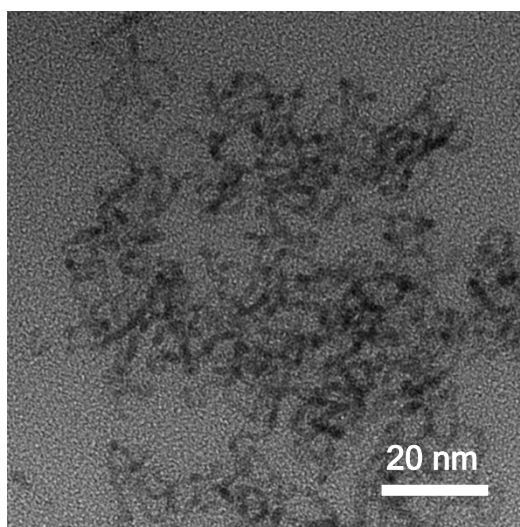

Figure S2. TEM image of Ru-PVP.

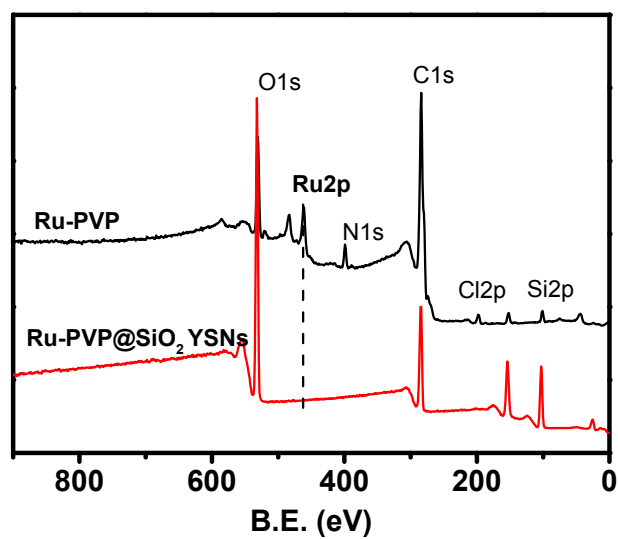

Figure S3. XPS spectra of Ru-PVP and Ru-PVP@SiO<sub>2</sub> YSNs

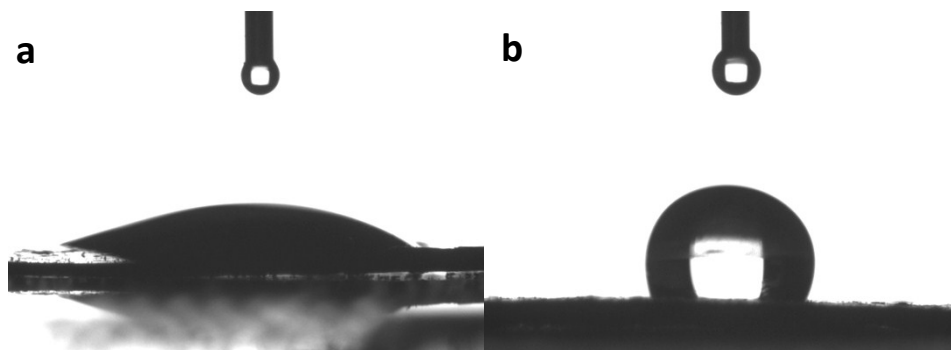

Figure S4. Water drops on (a) Ru-PVP@SiO<sub>2</sub> YSNs and (b) Ru-PVP@SiO<sub>2</sub>-phenyl YSNs.

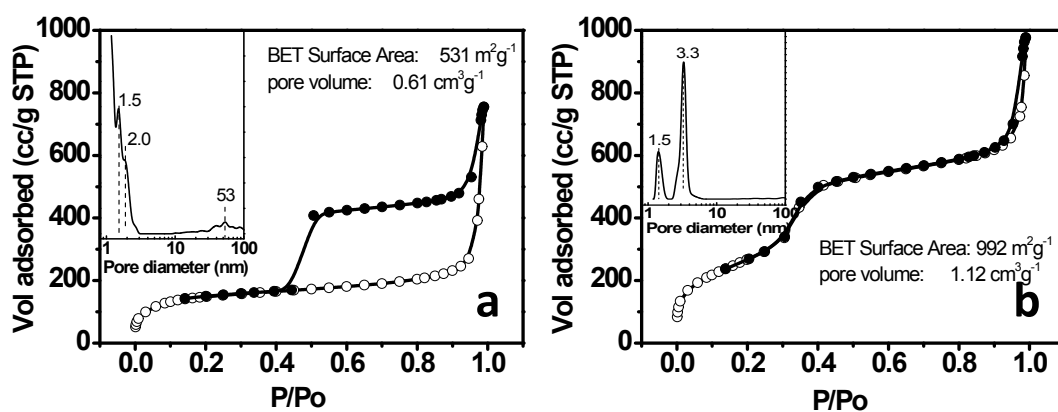

Figure S5. N<sub>2</sub> sorption isotherms of (a) Ru-PVP@SiO<sub>2</sub>-phenyl YSNs and (b) Ru-PVP@SiO<sub>2</sub> CSNs.

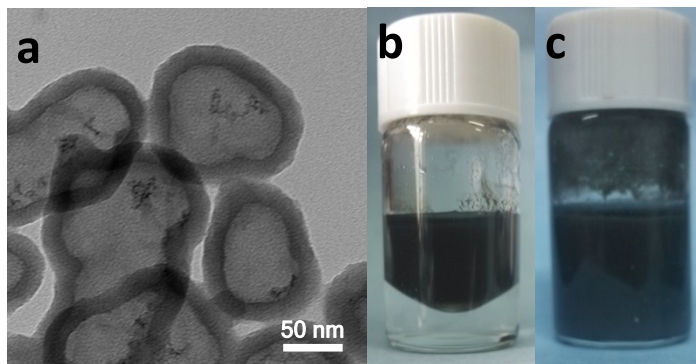

Figure S6. (a) TEM images of Ru-PVP@SiO<sub>2</sub>-phenyl YSNs and photos of Ru-PVP@SiO<sub>2</sub>-phenyl YSNs in water (b) before and (c) after stirring.

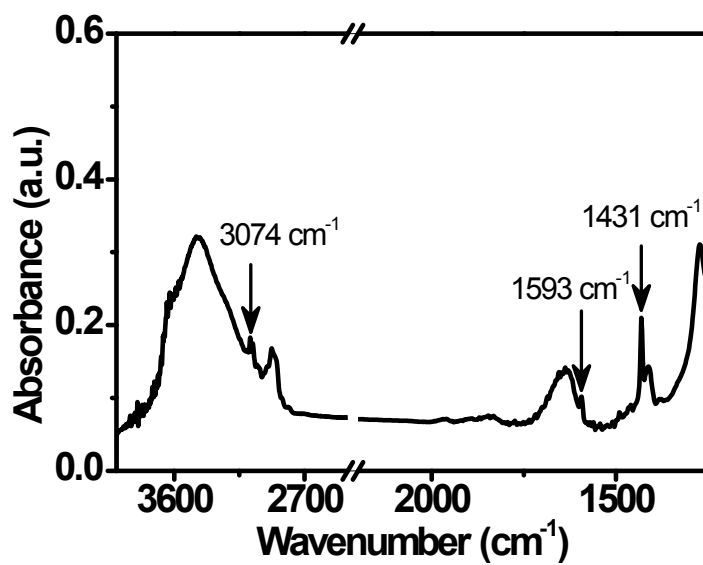

Figure S7. IR spectrum of Ru-PVP@SiO<sub>2</sub>-phenyl YSNs
